# Supplementary material for: Glucosyl Platinum(II) Complexes Inhibit Aggregation of the C-Terminal Region of the Aβ Peptide
Source: PubMed Central journal article supplement (PMC9951207; doi:10.1021/acs.inorgchem.1c03540), 2022-02-16
Supplement: ic1c03540_si_001.pdf [file ic1c03540_si_001.pdf]

## Supporting Information:

# A glucosyl platinum(II) complex inhibits the aggregation of the C-terminal region of A $\beta$ peptide

*Sara La Manna*<sup>1</sup>, *Marilisa Leone*<sup>2</sup>, *Ilaria Iacobucci*<sup>3, 4</sup>, *Alfonso Annuziata*<sup>3</sup>, *Concetta Di Natale*<sup>5</sup>,  
*Elena Lagreca*<sup>5</sup>, *Anna Maria Malfitano*<sup>6</sup>, *Francesco Ruffo*<sup>3</sup>, *Antonello Merlino*<sup>3</sup>, *Maria Monti*<sup>3,4,\*</sup>  
and *Daniela Marasco*<sup>1,2,\*</sup>

<sup>1</sup>Department of Pharmacy, University of Naples “Federico II”, 80131, Naples, Italy

<sup>2</sup>Institute of Biostructures and Bioimaging - CNR, 80134, Naples, Italy

<sup>3</sup>Department of Chemical Sciences, University of Naples “Federico II”, 80126, Naples, Italy

<sup>4</sup>CEINGE Biotecnologie Avanzate S.c.a r.l., “University of Naples Federico II”, 80131, Naples, Italy

<sup>5</sup>Interdisciplinary Research Centre on Biomaterials (CRIB), Department of Ingegneria Chimica dei Materiali e della Produzione Industriale (DICMAPI), University “Federico II”, 80125 Naples, Italy

<sup>6</sup>Department of Translational Medical Science, University of Naples “Federico II”, 80131, Naples, Italy

### Table of contents:

**Figure S1:** Time course of ThT fluorescence emission intensity of A $\beta$ <sub>1-42</sub>, alone and upon the incubation with 1Pt<sub>dep</sub> at the indicated peptide to metal molar ratio. Values are the average of two measurements.

**Figure S2:** ESI-MS spectra of the A $\beta$ <sub>21-40</sub> and A $\beta$ <sub>25-35</sub> alone.

**Figure S3:** ESI-MS spectra of A $\beta$ <sub>21-40</sub> peptide incubated with 1Pt for 0h and 24h.

**Figure S4:** ESI-MS spectra of A $\beta$ <sub>25-35</sub> peptide incubated with 1Pt for 0h and 24h.

**Figure S5:** Overlay of CD spectra at 0 and 24 h of 1Pt<sub>dep</sub>.

**Figure S6:** 2D [ $^1\text{H}$ ,  $^1\text{H}$ ] TOCSY spectrum of  $\text{A}\beta_{25-35}$  recorded at  $t=4\text{h}$ .

**Figure S7:** Overlay of 1D [ $^1\text{H}$ ] NMR spectra of  $1\text{Pt}_{\text{dep}}$  plus  $\text{A}\beta_{25-35}$ .

**Figure S8:** Comparison between 1D [ $^1\text{H}$ ] NMR spectra of  $1\text{Pt}_{\text{dep}}$  alone at  $t=0$  and  $1\text{Pt}_{\text{dep}}$  in presence of  $\text{A}\beta_{25-35}$  at  $t=4$  hours.

**Figure S9:** Time course UV-vis spectra of  $1\text{Pt}$  at  $50\ \mu\text{M}$  in 2% - DMSO phosphate buffer 10 mM at pH 7.4.

**Figure S10:** Cell survival of SH-SY5Y cells treated with  $\text{A}\beta_{21-40}$  and  $\text{A}\beta_{25-35}$  ( $100\ \mu\text{M}$ ) alone or with  $1\text{Pt}_{\text{dep}}$  or  $1\text{Pt}$  at 1:5 molar ratio at three time points: 0, 2 and 24 hours. Cells with peptides were incubated for 24h and then processed for MTT test. (\* $p < 0.05$ , \*\* $p < 0.005$ , # $p < 0.001$ , &math p < 0.0001 at statistical analysis of one experiment performed in triplicates).

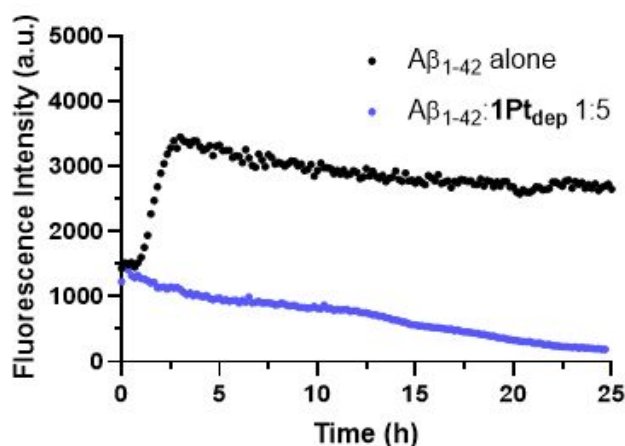

**Figure S1.** Time course of ThT fluorescence emission intensity of  $\text{A}\beta_{1-42}$ , alone and upon the incubation with  $1\text{Pt}_{\text{dep}}$  at the indicated peptide to metal molar ratio. Values are the average of two measurements.

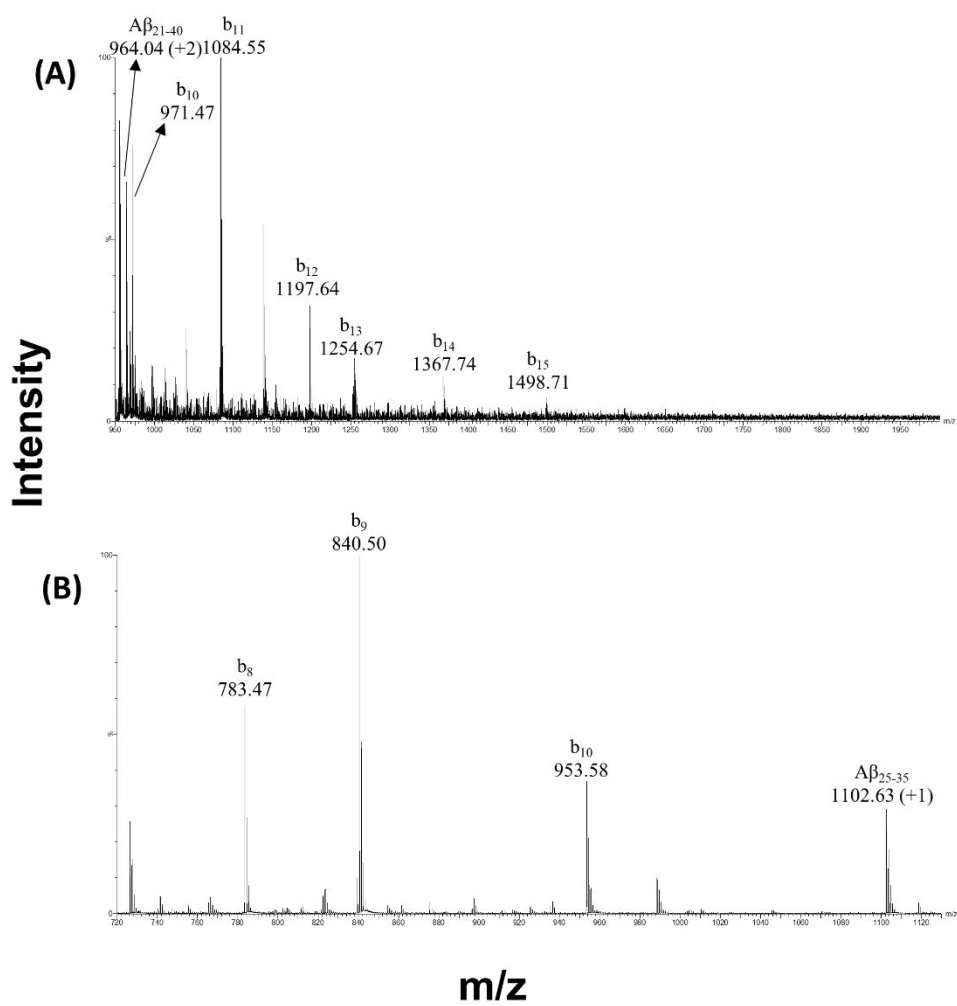

Figure S2. ESI-MS spectra of the (A)  $A\beta_{21-40}$  and (B)  $A\beta_{25-35}$  alone. Fragmentation ions are also reported.

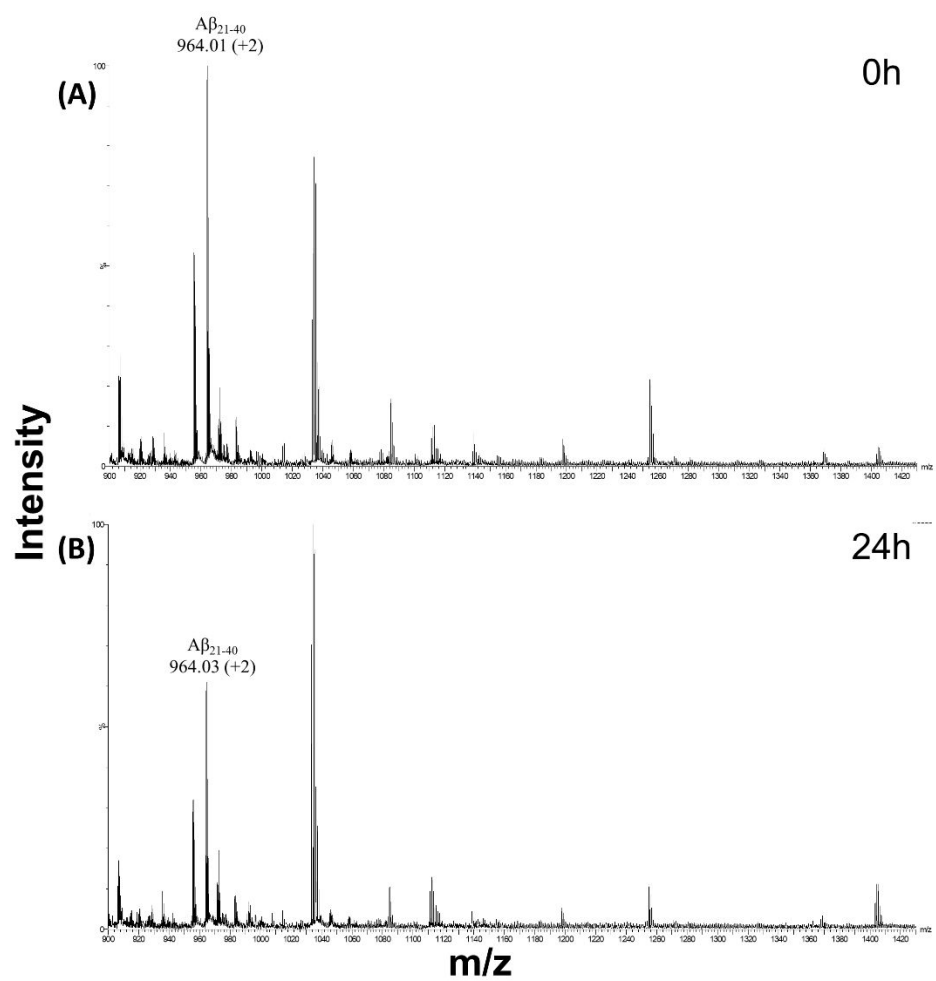

Figure S3. ESI-MS spectra of  $A\beta_{21-40}$  peptide incubated with 1Pt for (A) 0h and (B) 24h.

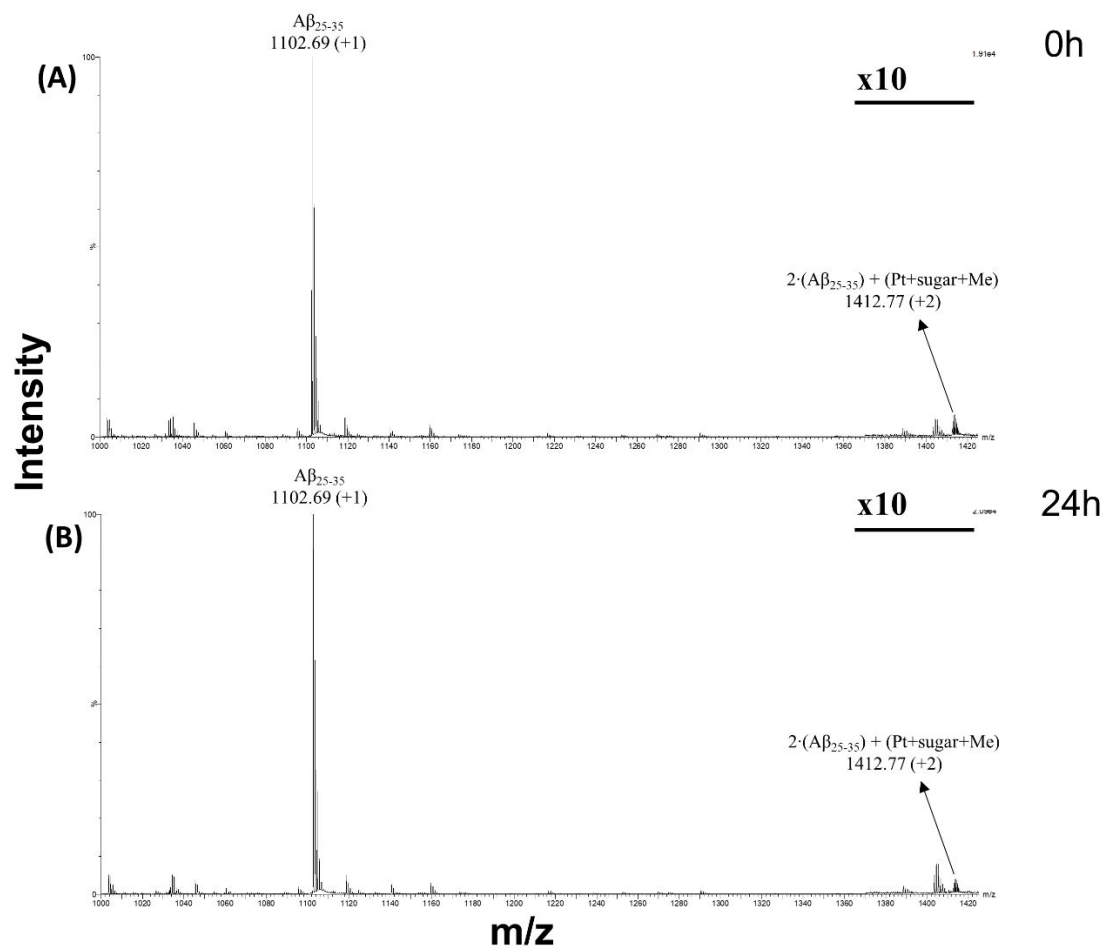

**Figure S4.** ESI-MS spectra of  $A\beta_{25-35}$  peptide incubated with 1Pt for (A) 0h and (B) 24h. The  $m/z$  range between 1300 and 1500 is 10 times magnified.

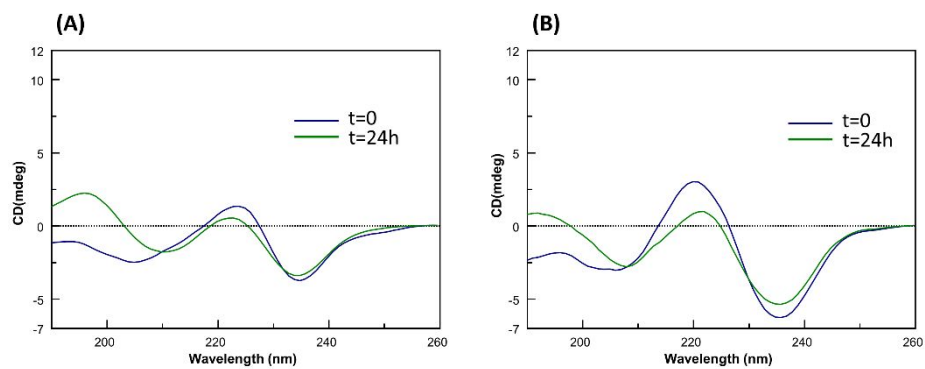

**Figure S5.** Overlay of CD spectra at 0 and 24 h of  $1\text{Pt}_{\text{dep}}$  at (A)  $125 \mu\text{M}$  and (B)  $250 \mu\text{M}$ .

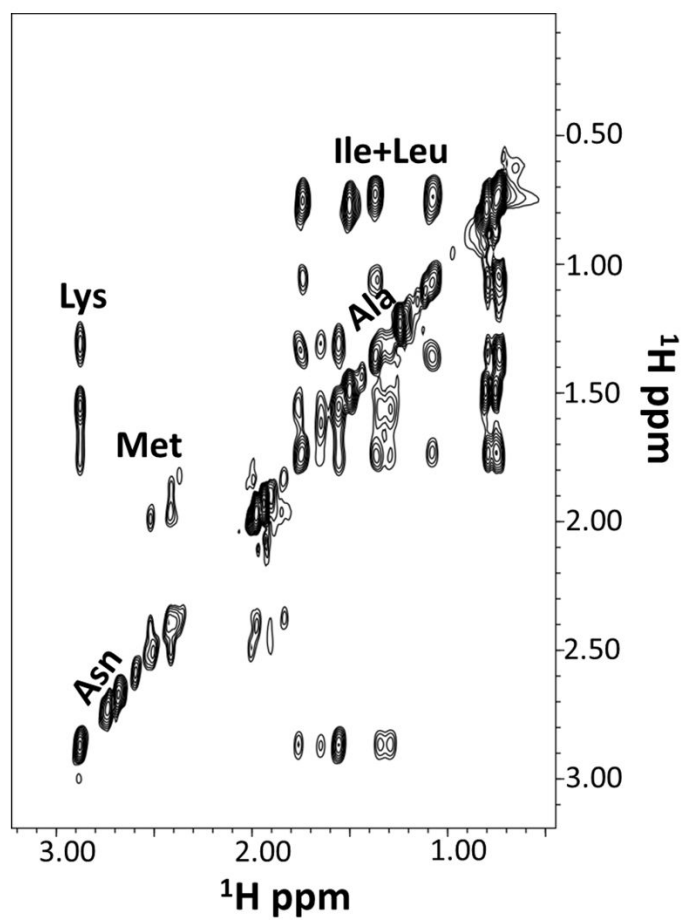

**Figure S6.** 2D [ $^1\text{H}$ ,  $^1\text{H}$ ] TOCSY spectrum of  $\text{A}\beta_{25-35}$  recorded at  $t=4\text{h}$ . Correlations arising from  $\text{cH}_2$  and  $\text{cH}_3$  side chain protons can be seen in the reported expansion.

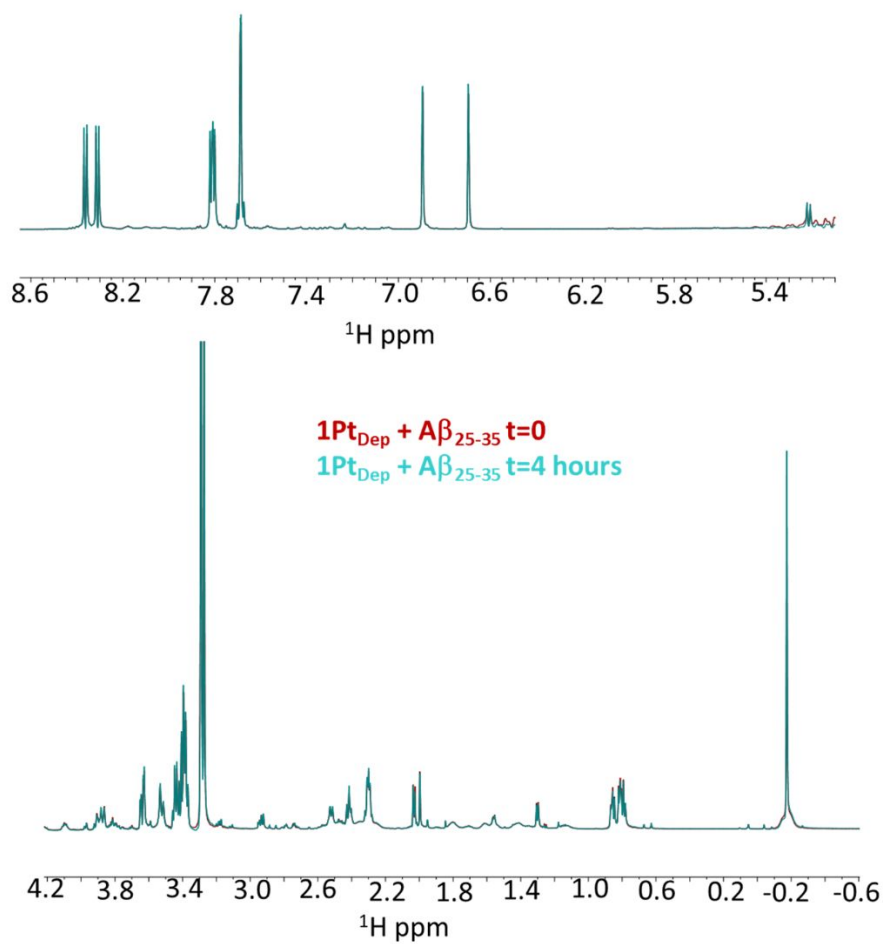

**Figure S7.** Overlay of 1D [ $^1\text{H}$ ] NMR spectra of **1Pt<sub>Dep</sub>** (2 mM) plus A $\beta$ <sub>25-35</sub> (400  $\mu\text{M}$ ) at t=0 (red) and after four hours (cyan).



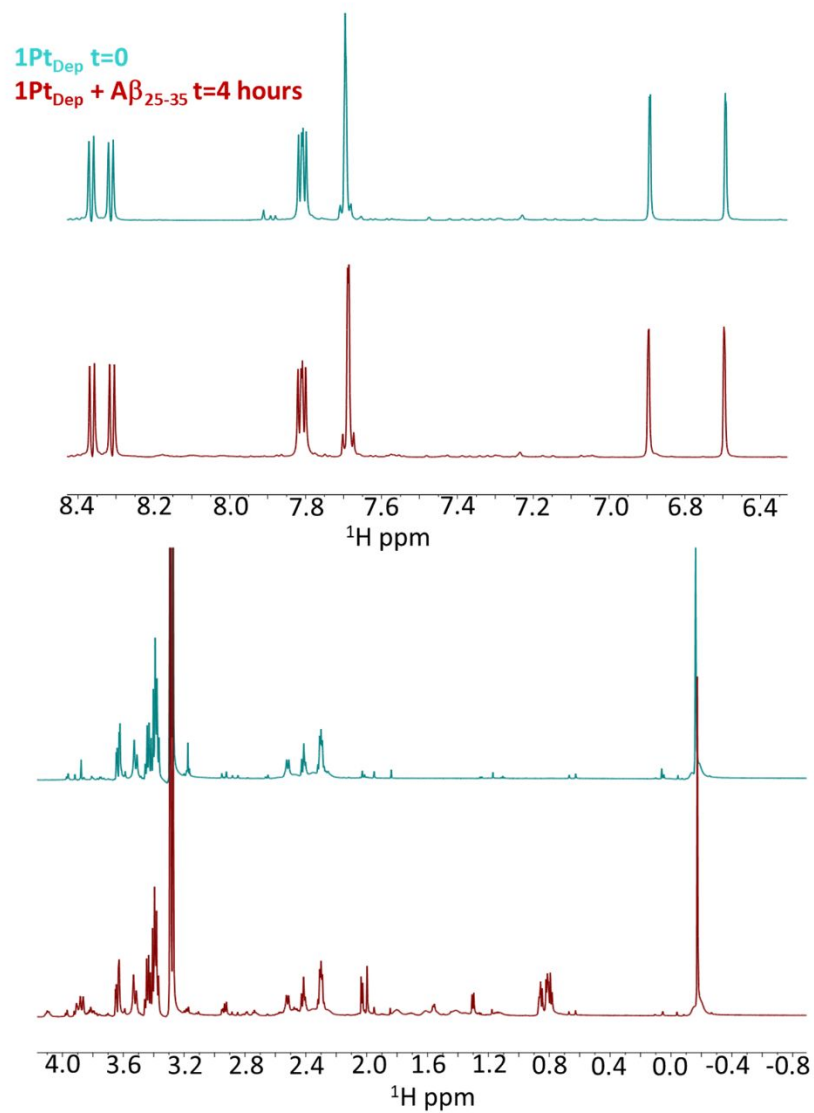

**Figure S8.** Comparison between 1D [<sup>1</sup>H] NMR spectra of **1Pt<sub>dep</sub>** alone at t=0 (cyan) and **1Pt<sub>dep</sub>** in presence of **Aβ<sub>25-35</sub>** at t=4 hours (red).

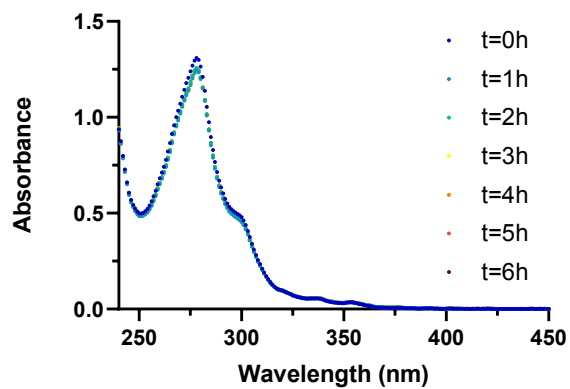

**Figure S9.** Time course UV-vis spectra of **1Pt** at 50  $\mu\text{M}$  in 2% - DMSO phosphate buffer 10 mM at pH 7.4.

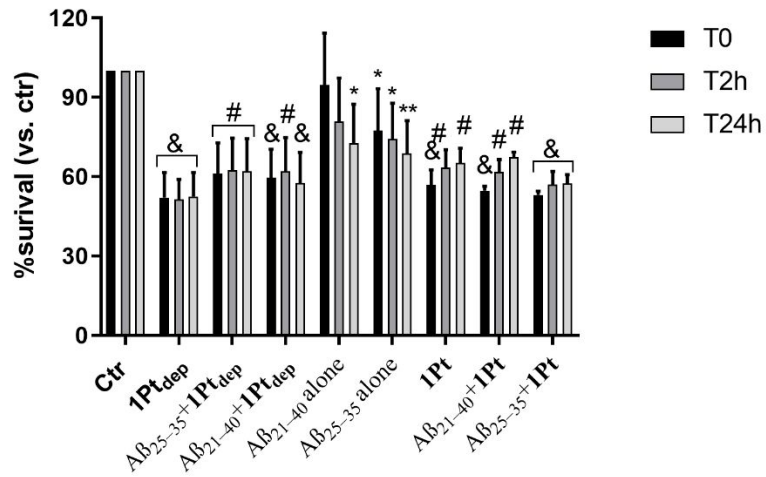

**Figure S10.** Cell survival of SH-SY5Y cells treated with A $\beta_{21-40}$  and A $\beta_{25-35}$  (100  $\mu$ M) alone or with 1Pt<sub>dep</sub> or 1Pt at 1:5 molar ratio at three time points: 0, 2 and 24 hours. Cells with peptides were incubated for 24h and then processed for MTT test. (\*p < 0.05, \*\*p < 0.005, #p < 0.001, &p < 0.0001 at statistical analysis of one experiment performed in triplicates).
